# Supplementary material for: Detection of Circulating Tumor Cells Using Negative Enrichment Immunofluorescence and an In Situ Hybridization System in Pancreatic Cancer
Source: PubMed Central journal article supplement (PMC5412265; doi:10.3390/ijms18040622), 2017-03-23
Supplement: ijms-18-00622-s001.pdf [file ijms-18-00622-s001.pdf]

## Supplementary Data

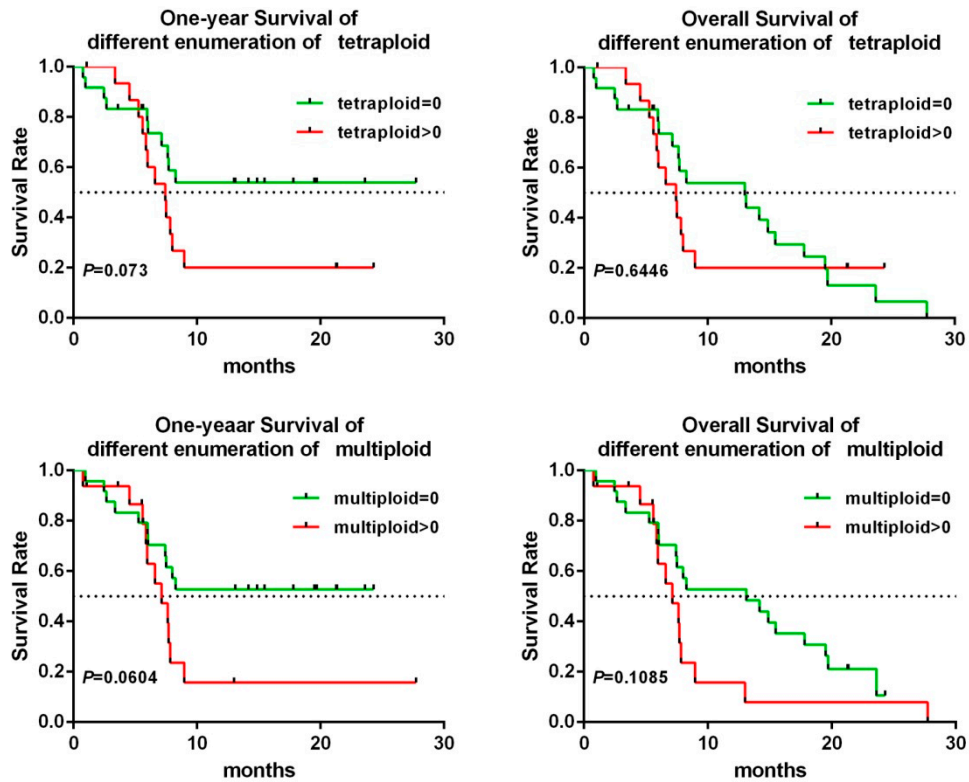

**Supplementary Figure S1. Correlation between aneuploidy (tetraploid and multiploid CTCs) and the clinical prognosis.** Overall Survival and one-year survival are irrelevant to the number of tetraploid and multiploid CTCs. CTCs: circulating tumor cells.

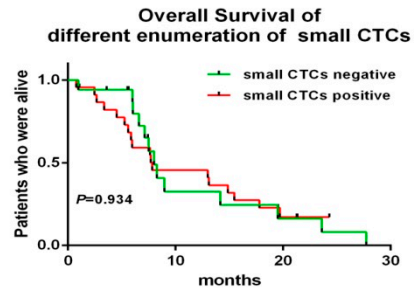

**Supplementary Figure S2. Overall survival with different numbers of small CTCs.** There is no relationship between overall survival and the number of small CTCs (hazard ratio for death, 0.9713; 95% CI 0.4757 to 1.975,  $P=0.934$ ).

**Supplementary Table S1. Clinical characteristics of the pancreatic cancer patients.**

| Variable                  | NO. | No.of patients(%)          |                       | P value |
|---------------------------|-----|----------------------------|-----------------------|---------|
|                           |     | CTCs number $\geq$ 2/7.5ml | CTCs number < 2/7.5ml |         |
| Total patients            | 40  | 31 (77.5%)                 | 9 (22.5%)             |         |
| Age                       |     |                            |                       | 0.142   |
| $\geq$ 65                 | 14  | 9 (64.3%)                  | 5 (35.7%)             |         |
| < 65                      | 26  | 22 (84.6%)                 | 4 (15.4%)             |         |
| Gender                    |     |                            |                       | 0.769   |
| male                      | 25  | 19 (76%)                   | 6 (24%)               |         |
| female                    | 15  | 12 (80%)                   | 3 (20%)               |         |
| Tumor Stage               |     |                            |                       | 0.656   |
| I-II                      | 11  | 8 (72.7%)                  | 3 (27.3%)             |         |
| III-IV                    | 29  | 23 (79.3%)                 | 6 (20.7%)             |         |
| Lymph nodes               |     |                            |                       | 0.835   |
| N0                        | 19  | 15 (78.9%)                 | 4 (21.1%)             |         |
| N1                        | 21  | 16 (76.2%)                 | 5 (23.8%)             |         |
| Metastasis                |     |                            |                       | 0.368   |
| M0                        | 17  | 12 (70.6%)                 | 5 (29.4%)             |         |
| M1                        | 23  | 19 (82.6%)                 | 4 (17.4%)             |         |
| Pancreatic tumor location |     |                            |                       | 0.804   |
| Head                      | 28  | 22 (78.6%)                 | 6 (21.4%)             |         |
| Body and tail             | 12  | 9 (75%)                    | 3 (25%)               |         |
| CA199 (umol/L)            |     |                            |                       | 0.142   |
| > 37                      | 31  | 23 (74.2%)                 | 8 (25.8%)             |         |
| $\leq$ 37                 | 9   | 8 (88.9%)                  | 1 (11.1%)             |         |
